# Supplementary material for: Effect of Statin on Cancer Incidence: An Umbrella Systematic Review and Meta-Analysis
Source: PubMed Central journal article supplement (PMC6617015; doi:10.3390/jcm8060819), 2019-06-08
Supplement: jcm-08-00819-s001.pdf [file jcm-08-00819-s001.pdf]

## **Supplements**

**Effect of statin on cancer incidence: an umbrella systematic  
review and meta-analysis**

**Supplementary Table S1. Reanalysis of each meta-analysis on associations of the use of statin and the incidence of cancers**

| Type / Author, year                             | Study design          | No of studies | No of cases/total participants | Random effects (reported) (ES, 95%CI) | Random effects (re-analyzed) (ES, 95%CI) | Fixed effects (re-analyzed) (ES, 95%CI) | Largest effect§  | D/N/I   | Egger | I <sup>2</sup> (P) † | P (random) | P (fixed) | 95% PI (random) | 95% PI (fixed) | Small study effects | Concordant direction | Evidence        |
|-------------------------------------------------|-----------------------|---------------|--------------------------------|---------------------------------------|------------------------------------------|-----------------------------------------|------------------|---------|-------|----------------------|------------|-----------|-----------------|----------------|---------------------|----------------------|-----------------|
| <b>Bladder cancer</b>                           | Overall               | 13            | 466292/1266218                 | 1.07 (0.95-1.21)                      | 1.07 (0.95-1.21)                         | 1.12 (1.07-1.19)                        | 1.08 (0.99-1.19) | 0/11/2  | 0.851 | 62.6 (0.001)         | 0.282      | <0.001    | 0.76-1.51       | 0.81-1.56      | No                  | Yes                  | Non-significant |
| Zhang 2013                                      | Overall               | 13            | 466292/1266218                 | 1.07 (0.95-1.21)                      | 1.07 (0.95-1.21)                         | 1.12 (1.07-1.19)                        | 1.08 (0.99-1.19) | 0/11/2  | 0.851 | 62.6 (0.001)         | 0.282      | <0.001    | 0.76-1.51       | 0.81-1.56      | No                  | Yes                  | Non-significant |
| Zhang 2013                                      | RCT                   | 3             | 12989/25977                    | 0.83 (0.63-1.10)                      | 0.84 (0.64-1.09)                         | 0.84 (0.64-1.09)                        | 0.81 (0.63-1.10) | 0/3/0   | 0.008 | 0.0 (0.711)          | 0.180      | 0.180     | 0.15-4.60       | 0.15-4.60      | Yes                 | Yes                  | Non-significant |
| Zhang 2013                                      | Observational studies | 10            | 453303/1240241                 | -                                     | 1.11 (0.97-1.26)                         | 1.14 (1.08-1.21)                        | 1.08 (0.99-1.19) | 0/8/2   | 0.901 | 66.2 (0.002)         | 0.118      | <0.001    | 0.77-1.58       | 0.82-1.59      | No                  | Yes                  | Non-significant |
| Zhang 2013                                      | Case-control          | 5             | 5268/59847                     | 1.12 (0.98-1.28)                      | 1.12 (0.98-1.28)                         | 1.12 (0.98-1.28)                        | 1.15 (0.94-1.29) | 0/5/0   | 0.983 | 0.0 (0.681)          | 0.086      | 0.086     | 0.90-1.41       | 0.90-1.41      | No                  | Yes                  | Non-significant |
| Zhang 2013                                      | Cohort                | 5             | 448035/1180394                 | 1.11 (0.91-1.35)                      | 1.11 (0.91-1.35)                         | 1.14 (1.08-1.22)                        | 1.08 (0.99-1.19) | 0/3/2   | 0.860 | 83.5 (<0.001)        | 0.303      | <0.001    | 0.58-2.13       | 0.64-2.04      | No                  | Yes                  | Non-significant |
| <b>Breast cancer</b>                            | Overall               | 62            | NA/3884629                     | -                                     | 0.91 (0.85-0.97)                         | 1.00 (0.97-1.02)                        | 1.04 (0.98-1.11) | 12/44/3 | 0.023 | 79.6 (<0.001)        | 0.004      | 0.724     | 0.63-1.32       | 0.69-1.44      | Yes                 | No                   | Weak            |
| Islam 2017                                      | Overall               | 36            | 121399/2775226                 | 0.95 (0.87-1.04)                      | 0.95 (0.87-1.04)                         | 1.02 (0.99-1.05)                        | 1.01 (0.96-1.06) | 3/31/2  | 0.308 | 83.8 (<0.001)        | 0.248      | 0.195     | 0.62-1.46       | 0.66-1.55      | No                  | Yes                  | Non-significant |
| Mansourian 2016                                 | Observational studies | 16            | NA/32445                       | 0.79 (0.74-0.85)                      | 0.77 (0.69-0.86)                         | 0.79 (0.74-0.85)                        | 0.79 (0.74-0.85) | 6/10/0  | 0.084 | 38.2 (0.061)         | <0.001     | <0.001    | 0.57-1.03       | 0.60-1.05      | Yes                 | No                   | Suggestive      |
| Undela 2012                                     | Observational studies | 21            | 76759/265482                   | 0.99 (0.94-1.04)                      | 0.99 (0.94-1.04)                         | 1.00 (0.98-1.03)                        | 1.04 (0.98-1.11) | 2/18/1  | 0.288 | 57.0 (<0.001)        | 0.695      | 0.693     | 0.84-1.16       | 0.87-1.17      | No                  | Yes                  | Non-significant |
| Taylor 2008                                     | Case-control          | 6             | NA/91616                       | 0.86 (0.60-1.23)                      | 0.86 (0.60-1.23)                         | 0.78 (0.67-0.89)                        | 0.90 (0.61-1.32) | 1/5/0   | 0.309 | 81.6 (<0.001)        | 0.419      | <0.001    | 0.26-2.87       | 0.26-2.34      | No                  | Yes                  | Non-significant |
| Bonovas 2005                                    | Overall               | 16            | 7873/283370                    | 1.02 (0.89-1.18)                      | 1.02 (0.89-1.18)                         | 1.03 (0.93-1.14)                        | 1.02 (0.76-1.36) | 1/13/2  | 0.660 | 30.0 (0.120)         | 0.748      | 0.548     | 0.72-1.45       | 0.74-1.44      | No                  | Yes                  | Non-significant |
| Bonovas 2005                                    | RCT                   | 7             | 269/17049                      | 1.19 (0.81-1.73)                      | 1.18 (0.81-1.73)                         | 1.04 (0.81-1.33)                        | 0.75 (0.49-1.13) | 0/6/1   | 0.004 | 44.0 (0.100)         | 0.380      | 0.778     | 0.45-3.10       | 0.43-2.52      | Yes                 | Yes                  | Non-significant |
| Bonovas 2005                                    | Observational studies | 9             | 7604/266321                    | 1.01 (0.88-1.17)                      | 1.01 (0.88-1.17)                         | 1.03 (0.92-1.15)                        | 1.02 (0.76-1.36) | 1/7/1   | 0.259 | 26.0 (0.220)         | 0.874      | 0.595     | 0.74-1.39       | 0.77-1.38      | No                  | Yes                  | Non-significant |
| <b>Colorectal cancer</b>                        | Overall               | 59            | NA/13855147                    | -                                     | 0.92 (0.88-0.95)                         | 0.94 (0.93-0.96)                        | 0.88 (0.81-0.95) | 15/33/3 | 0.106 | 71.5 (<0.001)        | <0.001     | <0.001    | 0.76-1.11       | 0.78-1.14      | No                  | Yes                  | Weak            |
| Lytras 2014                                     | Overall               | 40            | NA/8302033                     | -                                     | 0.91 (0.87-0.96)                         | 0.94 (0.92-0.96)                        | 0.88 (0.81-0.95) | 10/29/1 | 0.108 | 70.6 (<0.001)        | <0.001     | <0.001    | 0.74-1.13       | 0.77-1.15      | No                  | Yes                  | Weak            |
| Lytras 2014                                     | RCT                   | 8             | NA/155988                      | 0.89 (0.74-1.07)                      | 0.89 (0.74-1.07)                         | 0.90 (0.78-1.05)                        | 0.87 (0.68-1.12) | 0/8/0   | 0.312 | 25.0 (0.230)         | 0.221      | 0.177     | 0.60-1.32       | 0.62-1.31      | No                  | Yes                  | Non-significant |
| Lytras 2014                                     | Observational studies | 32            | 13092/8146045                  | -                                     | 0.92 (0.87-0.96)                         | 0.94 (0.92-0.96)                        | 0.88 (0.81-0.95) | 10/21/1 | 0.158 | 74.8 (<0.001)        | <0.001     | <0.001    | 0.74-1.13       | 0.77-1.16      | No                  | Yes                  | Weak            |
| Lytras 2014                                     | Case-control          | 19            | 100973/1307877                 | 0.92 (0.87-0.98)                      | 0.92 (0.87-0.98)                         | 0.94 (0.91-0.96)                        | 0.92 (0.89-0.96) | 6/13/0  | 0.272 | 64.0 (<0.001)        | 0.007      | <0.001    | 0.79-1.09       | 0.80-1.08      | No                  | Yes                  | Non-significant |
| Lytras 2014                                     | Cohort                | 13            | 30019/6838168                  | 0.91 (0.83-1.00)                      | 0.91 (0.83-1.00)                         | 0.96 (0.93-0.99)                        | 0.88 (0.81-0.95) | 4/8/1   | 0.221 | 83.0 (<0.001)        | 0.042      | 0.011     | 0.65-1.26       | 0.70-1.31      | No                  | Yes                  | Weak            |
| Liu 2014                                        | Overall               | 42            | NA/7911674                     | 0.90 (0.86-0.95)                      | 0.90 (0.86-0.95)                         | 0.93 (0.91-0.96)                        | 0.91 (0.86-0.96) | 9/33/0  | 0.113 | 66.5 (<0.001)        | <0.001     | <0.001    | 0.71-1.15       | 0.74-1.18      | No                  | Yes                  | Weak            |
| Liu 2014                                        | RCT                   | 11            | NA/95984                       | 0.96 (0.85-1.08)                      | 0.96 (0.85-1.08)                         | 0.94 (0.86-1.04)                        | 0.90 (0.77-1.03) | 0/11/0  | 0.766 | 21.6 (0.238)         | 0.491      | 0.239     | 0.74-1.24       | 0.75-1.20      | No                  | Yes                  | Non-significant |
| Liu 2014                                        | Observational studies | 31            | NA/7911361                     | -                                     | 0.89 (0.94-0.95)                         | 0.93 (0.91-0.96)                        | 0.93 (0.86-1.00) | 9/22/0  | 0.055 | 72.6 (<0.001)        | <0.001     | <0.001    | 0.70-1.14       | 0.74-1.18      | Yes                 | Yes                  | Weak            |
| Liu 2014                                        | Case-control          | 18            | NA/344142                      | 0.84 (0.76-0.93)                      | 0.84 (0.76-0.93)                         | 0.93 (0.90-0.96)                        | 0.91 (0.86-0.96) | 6/12/0  | 0.109 | 78.2 (<0.001)        | 0.001      | <0.001    | 0.60-1.20       | 0.67-1.29      | No                  | Yes                  | Weak            |
| Liu 2014                                        | Cohort                | 13            | NA/7567219                     | 0.93 (0.87-0.99)                      | 0.93 (0.87-0.99)                         | 0.94 (0.91-0.97)                        | 0.93 (0.86-1.00) | 3/10/0  | 0.424 | 61.6 (0.002)         | 0.019      | 0.001     | 0.76-1.13       | 0.78-1.13      | No                  | No                   | Weak            |
| Bardou 2010                                     | Overall               | 32            | NA/1702218                     | 0.92 (0.87-0.97)                      | 0.92 (0.87-0.97)                         | 0.93 (0.91-0.95)                        | 0.92 (0.89-0.96) | 7/23/2  | 0.640 | 66.0 (<0.001)        | 0.002      | <0.001    | 0.75-1.13       | 0.77-1.13      | No                  | Yes                  | Weak            |
| Bardou 2010                                     | RCT                   | 11            | NA/95984                       | 0.93 (0.81-1.08)                      | 0.93 (0.81-1.08)                         | 0.89 (0.81-0.98)                        | 0.79 (0.68-0.91) | 1/9/1   | 0.315 | 42.0 (0.070)         | 0.347      | 0.014     | 0.65-1.34       | 0.64-1.25      | No                  | No                   | Non-significant |
| Bardou 2010                                     | Observational studies | 21            | NA/1606234                     | -                                     | 0.92 (0.87-0.98)                         | 0.93 (0.91-0.96)                        | 0.99 (0.92-1.06) | 6/14/1  | 0.569 | 73.2 (<0.001)        | 0.006      | <0.001    | 0.75-1.13       | 0.77-1.14      | No                  | No                   | Weak            |
| Bardou 2010                                     | Case-control          | 13            | NA/821416                      | 0.92 (0.89-0.95)                      | 0.92 (0.89-0.95)                         | 0.92 (0.90-0.94)                        | 0.92 (0.89-0.96) | 4/9/0   | 0.875 | 6.0 (0.39)           | <0.001     | <0.001    | NA              | NA             | No                  | Yes                  | -               |
| Bardou 2010                                     | Cohort                | 8             | NA/784818                      | 0.89 (0.75-1.05)                      | 0.89 (0.75-1.05)                         | 0.99 (0.94-1.04)                        | 0.99 (0.92-1.06) | 2/5/1   | 0.315 | 87.0 (<0.001)        | 0.166      | 0.606     | 0.51-1.55       | 0.58-1.67      | No                  | Yes                  | Non-significant |
| Taylor 2008                                     | Case-control          | 7             | NA/969636                      | 0.89 (0.82-0.97)                      | 0.89 (0.82-0.97)                         | 0.92 (0.89-0.95)                        | 0.94 (0.89-1.00) | 2/5/0   | 0.225 | 52.8 (0.048)         | 0.006      | <0.001    | 0.73-1.08       | 0.78-1.08      | No                  | No                   | Weak            |
| Bonovas 2007                                    | Overall               | 18            | 38374/1553407                  | 0.92 (0.89-0.96)                      | 0.92 (0.89-0.96)                         | 0.92 (0.90-0.95)                        | 0.94 (0.89-1.00) | 2/16/0  | 0.549 | 7.0 (0.350)          | <0.001     | <0.001    | 0.86-0.99       | 0.86-0.99      | No                  | No                   | Convincing      |
| Bonovas 2007                                    | RCT                   | 6             | 610/55113                      | 0.95 (0.80-1.13)                      | 0.95 (0.80-1.13)                         | 0.95 (0.81-1.11)                        | 0.87 (0.68-1.12) | 0/6/0   | 0.878 | 9.0 (0.360)          | 0.565      | 0.518     | 0.70-1.29       | 0.71-1.27      | No                  | Yes                  | Non-significant |
| Bonovas 2007                                    | Observational studies | 12            | 38124/1498294                  | 0.92 (0.88-0.96)                      | 0.92 (0.88-0.96)                         | 0.92 (0.90-0.95)                        | 0.94 (0.89-1.00) | 2/10/0  | 0.377 | 16.0 (0.290)         | <0.001     | <0.001    | 0.86-0.99       | 0.86-0.99      | No                  | Yes                  | Convincing      |
| Bonovas 2007                                    | Case-control          | 9             | 34054/973545                   | 0.92 (0.89-0.96)                      | 0.91 (0.87-0.96)                         | 0.92 (0.89-0.95)                        | 0.94 (0.89-1.00) | 2/7/0   | 0.268 | 30.0 (0.180)         | 0.001      | <0.001    | 0.82-1.02       | 0.85-0.99      | No                  | No                   | Suggestive      |
| Bonovas 2007                                    | Cohort                | 3             | 4070/498613                    | 0.96 (0.84-1.11)                      | 0.96 (0.84-1.11)                         | 0.96 (0.84-1.11)                        | 0.85 (0.65-1.11) | 0/3/0   | 0.555 | 0.0 (0.530)          | 0.594      | 0.594     | 0.39-2.36       | 0.39-2.36      | No                  | Yes                  | Non-significant |
| <b>Endometrial cancer</b>                       | Overall               | 15            | NA/878885                      | 0.94 (0.82-1.07)                      | 0.94 (0.83-1.07)                         | 1.02 (0.97-1.08)                        | 1.05 (0.95-1.15) | 4/11/0  | 0.043 | 54.9 (<0.001)        | 0.349      | 0.423     | 0.66-1.34       | 0.73-1.43      | Yes                 | Yes                  | Non-significant |
| Yang 2017                                       | Overall               | 15            | NA/878885                      | 0.94 (0.82-1.07)                      | 0.94 (0.83-1.07)                         | 1.02 (0.97-1.08)                        | 1.05 (0.95-1.15) | 4/11/0  | 0.043 | 54.9 (<0.001)        | 0.349      | 0.423     | 0.66-1.34       | 0.73-1.43      | Yes                 | Yes                  | Non-significant |
| Yang 2017                                       | RCT                   | 2             | NA/1824                        | 0.72 (0.19-2.67)                      | 0.72 (0.19-2.67)                         | 0.72 (0.19-2.67)                        | 1.03 (0.21-5.08) | 0/2/0   | -     | 0.0 (0.43)           | 0.621      | 0.621     | NA              | NA             | -                   | Yes                  | Non-significant |
| Yang 2017                                       | Observational studies | 13            | NA/877061                      | 0.94 (0.82-1.07)                      | 0.94 (0.82-1.07)                         | 1.02 (0.97-1.08)                        | 1.05 (0.95-1.15) | 4/9/0   | 0.054 | 64.3 (<0.001)        | 0.361      | 0.411     | 0.65-1.37       | 0.72-1.45      | Yes                 | Yes                  | Non-significant |
| <b>Esophageal cancer</b>                        | Overall               | 27            | NA/3158414                     | -                                     | 0.70 (0.63-0.78)                         | 0.85 (0.71-0.89)                        | 0.68 (0.52-0.88) | 15/12/0 | 0.115 | 62.2 (<0.001)        | <0.001     | <0.001    | 0.46-1.05       | 0.50-1.11      | No                  | Yes                  | Suggestive**    |
| Thomas 2017 (patients with Barrett's esophagus) | Observational studies | 10            | NA/17516                       | 0.59 (0.50-0.68)                      | 0.59 (0.50-0.68)                         | 0.59 (0.50-0.68)                        | 0.61 (0.45-0.83) | 7/3/0   | 0.654 | 0.0 (0.800)          | <0.001     | <0.001    | 0.49-0.70       | 0.49-0.70      | No                  | Yes                  | Convincing      |
| Thomas 2017 (esophageal adenocarcinoma)         | Observational studies | 3             | NA/4305                        | 0.57 (0.43-0.76)                      | 0.57 (0.43-0.76)                         | 0.57 (0.43-0.76)                        | 0.58 (0.39-0.87) | 2/1/0   | 0.881 | 0.0 (0.920)          | <0.001     | <0.001    | 0.09-3.76       | 0.09-3.76      | No                  | Yes                  | Suggestive      |
| Thomas 2017 (esophageal carcinoma)              | Observational studies | 7             | NA/2042238                     | 0.82 (0.76-0.88)                      | 0.82 (0.76-0.88)                         | 0.82 (0.76-0.88)                        | 0.83 (0.73-0.95) | 4/3/0   | 0.452 | 0.0 (0.490)          | <0.001     | <0.001    | 0.75-0.88       | 0.75-0.88      | No                  | Yes                  | Convincing      |
| Beales 2013 (patients with Barrett's esophagus) | Observational studies | 4             | 295/1847                       | 0.56 (0.41-0.76)                      | 0.56 (0.42-0.76)                         | 0.56 (0.42-0.76)                        | 0.56 (0.36-0.87) | 1/3/0   | 0.968 | 0.0 (0.930)          | <0.001     | <0.001    | 0.29-1.09       | 0.29-1.09      | No                  | Yes                  | Suggestive      |

|                                                    |                       |          |                |                  |                  |                  |                  |            |       |               |        |        |            |           |     |     |                 |
|----------------------------------------------------|-----------------------|----------|----------------|------------------|------------------|------------------|------------------|------------|-------|---------------|--------|--------|------------|-----------|-----|-----|-----------------|
| Beales 2013 (population-based)                     | Observational studies | 6        | NA/2024167     | 0.81 (0.75-0.88) | 0.82 (0.76-0.88) | 0.82 (0.76-0.88) | 0.84 (0.74-0.96) | 4/2/0      | 0.183 | 0.0 (0.420)   | <0.001 | <0.001 | 0.29-1.09  | 0.29-1.09 | No  | Yes | Suggestive      |
| Singh 2013 (esophageal cancer)                     | Overall               | 13       | 9285/1132969   | 0.72 (0.60-0.86) | 0.72 (0.60-0.86) | 0.76 (0.70-0.81) | 0.44 (0.36-0.53) | 6/7/0      | 0.547 | 74.0 (<0.001) | <0.001 | <0.001 | 0.40-1.30  | 0.43-1.33 | No  | Yes | Weak            |
| Singh 2013 (patients with Barrett's esophagus)     | Overall               | 5        | 312/2125       | 0.59 (0.45-0.78) | 0.59 (0.45-0.78) | 0.59 (0.45-0.78) | 0.56 (0.36-0.87) | 3/2/0      | 0.254 | 0.0 (0.540)   | <0.001 | <0.001 | 0.38-0.93  | 0.38-0.93 | No  | Yes | Convincing      |
| Alexandre 2012 (patients with Barrett's esophagus) | Cohort                | 2        | NA/1382        | 0.53 (0.36-0.78) | 0.53 (0.36-0.78) | 0.53 (0.36-0.78) | 0.56 (0.36-0.87) | 2/0/0      | -     | 0.0 (0.666)   | 0.001  | 0.001  | NA         | NA        | -   | Yes | -               |
| Alexandre 2012 (general population)                | Cohort                | 3        | NA/35214       | 0.86 (0.78-0.94) | 0.86 (0.78-0.94) | 0.86 (0.78-0.94) | 0.84 (0.74-0.96) | 1/2/0      | 0.824 | 0.0 (0.880)   | 0.001  | 0.001  | 0.49-1.51  | 0.49-1.51 | No  | Yes | Suggestive      |
| <b>Gastric cancer</b>                              | Overall               | 16       | NA/5396224     | -                | 0.74 (0.60-0.90) | 0.84 (0.79-0.88) | 0.97 (0.74-1.26) | 5/11/0     | 0.325 | 90.8 (<0.001) | 0.004  | <0.001 | 0.33-1.62  | 0.39-1.78 | No  | No  | Weak            |
| Ma 2014                                            | Case-control          | 6        | 11056/54800    | 0.56 (0.35-0.96) | 0.56 (0.35-0.89) | 0.81 (0.76-0.87) | 1.00 (0.89-1.12) | 3/3/0      | 0.274 | 97.0 (<0.001) | 0.015  | <0.001 | 0.11-2.98  | 0.18-3.62 | No  | No  | Weak            |
| Wu 2013                                            | Overall               | 12       | 7611/1002380   | 0.73 (0.58-0.93) | 0.73 (0.58-0.84) | 0.79 (0.74-0.84) | 0.84 (0.76-0.92) | 4/8/0      | 0.575 | 88.9 (<0.001) | 0.010  | <0.001 | 0.32-1.66  | 0.36-1.73 | No  | Yes | Weak            |
| Wu 2013                                            | RCT                   | 3        | 290/13987      | 0.84 (0.61-1.14) | 0.84 (0.61-1.14) | 0.84 (0.67-1.06) | 0.92 (0.69-1.22) | 1/2/0      | 0.776 | 28.5 (0.247)  | 0.259  | 0.142  | 0.05-13.53 | 0.07-9.70 | No  | Yes | Non-significant |
| Wu 2013                                            | Observational studies | 9        | 7321/988393    | 0.70 (0.53-0.93) | 0.70 (0.53-0.93) | 0.79 (0.74-0.84) | 0.84 (0.76-0.92) | 3/6/0      | 0.477 | 91.7 (<0.001) | 0.013  | <0.001 | 0.27-1.80  | 0.33-1.90 | No  | Yes | Weak            |
| Singh 2013                                         | Overall               | 11       | 5581/5459975   | 0.68 (0.51-0.91) | 0.68 (0.51-0.91) | 0.76 (0.71-0.82) | 0.97 (0.74-1.26) | 4/7/0      | 0.496 | 89.0 (<0.001) | 0.010  | <0.001 | 0.25-1.83  | 0.30-1.94 | No  | No  | Weak            |
| <b>Gynecological cancer</b>                        | Overall               | 24(23)*  | 12904/928721   | 0.89 (0.78-1.01) | 0.89 (0.78-1.02) | 1.00 (0.93-1.06) | 1.05 (0.95-1.15) | 4/20(19)/0 | 0.003 | 43.7 (0.014)  | 0.087  | 0.899  | 0.62-1.29  | 0.70-1.41 | Yes | Yes | Non-significant |
| Liu 2014                                           | Overall               | 24(23)*  | 12904/928721   | 0.89 (0.78-1.01) | 0.89 (0.78-1.02) | 1.00 (0.93-1.06) | 1.05 (0.95-1.15) | 4/20(19)/0 | 0.003 | 43.7 (0.014)  | 0.087  | 0.899  | 0.62-1.29  | 0.70-1.41 | Yes | Yes | Non-significant |
| Liu 2014                                           | RCT                   | 7(6)*    | 782252         | 0.97 (0.62-1.50) | 1.03 (0.65-1.63) | 1.03 (0.65-1.63) | 0.97 (0.62-1.50) | 0/6/0      | 0.031 | 0.0 (0.581)   | 0.902  | 0.902  | 0.54-1.97  | 0.54-1.97 | Yes | Yes | Non-significant |
| Liu 2014                                           | Observational studies | 17       | 12826/916459   | -                | 0.88 (0.76-1.01) | 1.00 (0.93-1.06) | 1.05 (0.95-1.15) | 4/13/0     | 0.005 | 54.6 (0.004)  | 0.069  | 0.884  | 0.59-1.32  | 0.68-1.46 | Yes | Yes | Non-significant |
| Liu 2014                                           | Case-control          | 7        | 7675/36385     | 0.61 (0.40-0.91) | 0.61 (0.40-0.91) | 0.62 (0.46-0.84) | 0.48 (0.26-0.89) | 3/4/0      | 0.518 | 41.7 (0.113)  | 0.015  | 0.002  | 0.22-1.70  | 0.24-1.65 | No  | Yes | Suggestive      |
| Liu 2014                                           | Cohort                | 10       | 5151/880074    | 0.97 (0.87-1.09) | 0.97 (0.87-1.09) | 1.02 (0.95-1.09) | 1.05 (0.95-1.15) | 1/9/0      | 0.101 | 40.0 (0.091)  | 0.647  | 0.572  | 0.74-1.28  | 0.79-1.31 | No  | Yes | Non-significant |
| <b>Hematological cancer</b>                        | Overall               | 35(34) * | NA             | -                | 0.89 (0.82-0.96) | 0.86 (0.81-0.90) | -                | 8(7)/26/1  | 0.161 | 46.7 (0.002)  | 0.005  | <0.001 | 0.60-1.20  | 0.64-1.15 | No  | -   | Suggestive      |
| Pradelli 2015                                      | Observational studies | 23(22)*  | 14442/NA       | 0.86 (0.77-0.96) | 0.88 (0.80-0.98) | 0.85 (0.80-0.90) | 0.78 (0.71-0.86) | 7(6)/15/1  | 0.281 | 55.6 (0.001)  | 0.018  | <0.001 | 0.62-1.25  | 0.61-1.19 | No  | Yes | Weak            |
| Pradelli 2015                                      | Case-control          | 11(10)*  | NA/11560       | 0.83 (0.62-1.09) | 0.89 (0.65-1.20) | 0.80 (0.73-0.87) | 0.78 (0.71-0.86) | 5(4)/5/1   | 0.570 | 74.6 (<0.001) | 0.443  | <0.001 | 0.35-2.25  | 0.34-1.89 | No  | No  | Non-significant |
| Pradelli 2015                                      | Cohort                | 12       | NA/2882        | 0.89 (0.82-0.95) | 0.89 (0.82-0.95) | 0.84 (0.72-0.95) | 0.84 (0.72-0.98) | 2/10/0     | 0.516 | 0.0 (0.660)   | 0.001  | 0.902  | 0.92-0.95  | 0.82-0.95 | No  | Yes | Convincing      |
| Yi 2014                                            | Overall               | 20(19)*  | 15297/1139584  | 0.81 (0.70-0.92) | 0.83 (0.73-0.95) | 0.81 (0.75-0.86) | 0.78 (0.71-0.86) | 6(5)/13/1  | 0.609 | 54.2 (0.003)  | 0.008  | <0.001 | 0.55-1.26  | 0.55-1.19 | No  | Yes | Weak            |
| Yi 2014                                            | RCT                   | 6        | 522/45526      | 0.92 (0.77-1.09) | 0.92 (0.78-1.09) | 0.92 (0.78-1.09) | 1.01 (0.81-1.25) | 0/6/0      | 0.330 | 0.0 (0.560)   | 0.344  | 0.344  | 0.34-0.56  | 0.34-0.56 | No  | Yes | Non-significant |
| Yi 2014                                            | Observational studies | 14(13)*  | 14775/1094058  | 0.79 (0.67-0.93) | 0.82 (0.70-0.97) | 0.79 (0.73-0.85) | 0.78 (0.71-0.86) | 6(5)/7/1   | 0.635 | 63.3 (0.001)  | 0.021  | <0.001 | 0.51-1.34  | 0.50-1.24 | No  | Yes | Weak            |
| Bonovas 2007                                       | Overall               | 14(13)*  | 5629/412053    | 0.85 (0.64-1.12) | 0.91 (0.68-1.20) | 0.90 (0.78-1.04) | 0.88 (0.60-1.29) | 3(2)/10/1  | 0.983 | 67.8 (<0.001) | 0.495  | 0.168  | 0.55-1.26  | 0.55-1.19 | No  | Yes | Non-significant |
| Bonovas 2007                                       | RCT                   | 6        | 311/46852      | 0.92 (0.72-1.16) | 0.92 (0.70-1.21) | 0.94 (0.75-1.18) | 1.32 (0.85-1.77) | 0/6/0      | 0.453 | 6.0 (0.380)   | 0.542  | 0.603  | 0.72-1.18  | 0.72-1.18 | No  | Yes | Non-significant |
| Bonovas 2007                                       | Observational studies | 8(7)*    | 5308/365201    | 0.83 (0.53-1.29) | 0.91 (0.55-1.51) | 0.87 (0.72-1.06) | 0.88 (0.60-1.29) | 3(2)/4/1   | 0.825 | 80.3 (<0.001) | 0.714  | 0.171  | 0.51-1.34  | 0.50-1.24 | No  | Yes | Non-significant |
| <b>Kidney cancer</b>                               | Overall               | 12(11)*  | 954880/4052120 | 0.92 (0.71-1.19) | 0.91 (0.70-1.17) | 0.94 (0.88-1.00) | 1.08 (0.99-1.18) | 2/10(9)/0  | 0.722 | 88.7 (<0.001) | 0.457  | 0.034  | 0.39-2.09  | 0.43-2.05 | No  | Yes | Non-significant |
| Zhang 2014                                         | Overall               | 12(11)*  | 954880/4052120 | 0.92 (0.71-1.19) | 0.91 (0.70-1.17) | 0.94 (0.88-1.00) | 1.08 (0.99-1.18) | 2/10(9)/0  | 0.722 | 88.7 (<0.001) | 0.457  | 0.034  | 0.39-2.09  | 0.43-2.05 | No  | Yes | Non-significant |
| Zhang 2014                                         | RCT                   | 2        | 10768/21533    | 1.01 (0.57-1.79) | 1.01 (0.57-1.78) | 1.01 (0.57-1.78) | 1.04 (0.58-1.86) | 0/2/0      | -     | 87.8 (<0.001) | 0.985  | 0.985  | NA         | NA        | -   | Yes | Non-significant |
| Zhang 2014                                         | Observational studies | 9        | 944112/4030587 | -                | 0.90 (0.69-1.18) | 0.93 (0.88-1.00) | 1.08 (0.99-1.18) | 2/8(7)/0   | 0.743 | 90.9 (<0.001) | 0.455  | 0.033  | 0.37-2.20  | 0.37-2.37 | No  | Yes | Non-significant |
| Zhang 2014                                         | Case-control          | 5        | 1989/520704    | 0.74 (0.45-1.23) | 0.74 (0.45-1.23) | 0.58 (0.51-0.67) | 0.52 (0.45-0.60) | 2/3/0      | 0.395 | 78.6 (0.001)  | 0.244  | <0.001 | 0.14-3.92  | 0.14-2.53 | No  | No  | Non-significant |
| Zhang 2014                                         | Cohort                | 5(4)*    | 942123/3509883 | 1.07 (0.96-1.20) | 1.07 (0.96-1.19) | 1.08 (1.00-1.16) | 1.08 (0.99-1.18) | 0/5(4)/0   | 0.643 | 30.6 (0.217)  | 0.210  | 0.041  | 0.75-1.53  | 0.80-1.46 | No  | Yes | Non-significant |
| <b>Leukemia</b>                                    | Observational studies | 9        | NA/1174        | 0.83 (0.74-0.92) | 0.85 (0.74-0.98) | 0.83 (0.74-0.92) | 0.74 (0.62-0.87) | 2/7/0      | 0.120 | 25.0 (0.220)  | 0.031  | 0.001  | 0.63-1.16  | 0.62-1.10 | No  | Yes | Suggestive      |
| Pradelli 2015                                      | Observational studies | 9        | NA/1174        | 0.83 (0.74-0.92) | 0.85 (0.74-0.98) | 0.83 (0.74-0.92) | 0.74 (0.62-0.87) | 2/7/0      | 0.120 | 25.0 (0.220)  | 0.031  | 0.001  | 0.63-1.16  | 0.62-1.10 | No  | Yes | Suggestive      |
| <b>Liver cancer</b>                                | Overall               | 27       | NA/2622626     | -                | 0.58 (0.52-0.66) | 0.65 (0.62-0.68) | 0.52 (0.41-0.66) | 22/5/0     | 0.117 | 83.8 (<0.001) | <0.001 | <0.001 | 0.33-1.03  | 0.38-1.13 | No  | Yes | Suggestive**    |
| Zhong 2016                                         | Overall               | 24       | NA/2167078     | 0.60 (0.52-0.69) | 0.60 (0.53-0.69) | 0.66 (0.63-0.68) | 0.53 (0.49-0.58) | 19/5/0     | 0.239 | 85.0 (<0.001) | <0.001 | <0.001 | 0.34-1.06  | 0.38-1.14 | No  | Yes | Suggestive**    |
| Shi 2014                                           | Overall               | 13       | 35756/5640313  | 0.58 (0.51-0.67) | 0.58 (0.51-0.67) | 0.57 (0.54-0.61) | 0.53 (0.49-0.58) | 11/2/0     | 0.729 | 65.0 (<0.001) | <0.001 | <0.001 | 0.38-0.89  | 0.39-0.85 | No  | Yes | Convincing**    |
| Singh 2013                                         | Overall               | 11       | 4298/1459417   | 0.63 (0.52-0.76) | 0.63 (0.52-0.76) | 0.64 (0.58-0.71) | 0.52 (0.41-0.66) | 6/5/0      | 0.879 | 59.0 (0.010)  | <0.001 | <0.001 | 0.37-1.07  | 0.39-1.05 | No  | Yes | Weak            |
| Pradelli 2013                                      | Observational studies | 6        | 2574/738873    | 0.58 (0.46-0.74) | 0.58 (0.46-0.74) | 0.63 (0.56-0.71) | 0.74 (0.64-0.87) | 5/1/0      | 0.451 | 65.0 (0.010)  | <0.001 | <0.001 | 0.29-1.16  | 0.34-1.18 | No  | Yes | Suggestive**    |
| <b>Lung cancer</b>                                 | Overall               | 33       | NA/8833965     | -                | 0.89 (0.80-0.99) | 0.82 (0.80-0.84) | 1.03 (0.94-1.21) | 5/28/0     | 0.265 | 94.9 (<0.001) | 0.036  | <0.001 | 0.51-1.57  | 0.47-1.42 | No  | No  | Weak            |
| Wang 2013                                          | Overall               | 20       | 37560/4980009  | 0.89 (0.78-1.02) | 0.89 (0.78-1.02) | 0.85 (0.82-0.87) | 0.81 (0.77-0.86) | 3/17/0     | 0.589 | 93.6 (<0.001) | 0.103  | <0.001 | 0.51-1.56  | 0.49-1.45 | No  | No  | Non-significant |
| Wang 2013                                          | RCT                   | 5        | 14830/29658    | 0.92 (0.79-1.06) | 0.92 (0.79-1.06) | 0.92 (0.79-1.06) | 0.93 (0.76-1.09) | 0/5/0      | 0.483 | 0.0 (<0.636)  | 0.248  | 0.248  | 0.72-1.17  | 0.72-1.17 | No  | Yes | Non-significant |
| Wang 2013                                          | Observational studies | 15       | 734373/4145990 | -                | 0.88 (0.75-1.03) | 0.84 (0.82-0.87) | 0.81 (0.77-0.86) | 3/12/0     | 0.705 | 95.2 (<0.001) | 0.113  | <0.001 | 0.49-1.60  | 0.48-1.49 | No  | No  | Non-significant |
| Wang 2013                                          | Case-control          | 7        | 19328/575804   | 0.81 (0.57-1.16) | 0.82 (0.57-1.16) | 0.72 (0.68-0.75) | 0.55 (0.52-0.59) | 1/6/0      | 0.664 | 96.4 (<0.001) | 0.252  | <0.001 | 0.25-2.68  | 0.32-2.91 | No  | No  | Non-significant |
| Wang 2013                                          | Cohort                | 8        | 712045/3570186 | 0.93 (0.82-1.06) | 0.93 (0.82-1.06) | 0.92 (0.89-0.95) | 0.81 (0.77-0.86) | 2/6/0      | 0.818 | 87.8 (<0.001) | 0.277  | <0.001 | 0.62-1.39  | 0.63-1.33 | No  | No  | Non-significant |
| Tan 2013                                           | Overall               | 19       | 52388/5008404  | -                | 0.89 (0.77-1.03) | 0.82 (0.80-0.84) | 0.55 (0.52-0.59) | 3/16/0     | 0.337 | 93.3 (<0.001) | 0.117  | <0.001 | 0.50-1.60  | 0.47-1.45 | No  | No  | Non-significant |
| Tan 2013                                           | RCT                   | 5        | 14830/29658    | 0.91 (0.76-1.09) | 0.91 (0.76-1.09) | 0.91 (0.76-1.08) | 0.81 (0.58-1.13) | 0/5/0      | 0.293 | 0.0 (0.633)   | 0.311  | 0.311  | 0.67-1.23  | 0.67-1.23 | No  | Yes | Non-significant |
| Tan 2013                                           | Observational studies | 14       | 37558/4979746  | 0.88 (0.75-1.04) | 0.88 (0.75-1.04) | 0.82 (0.79-0.84) | 0.55 (0.52-0.59) | 3/11/0     | 0.433 | 95.1 (<0.001) | 0.124  | <0.001 | 0.47-1.65  | 0.45-1.49 | No  | No  | Non-significant |
| Tan 2013                                           | Case-control          | 7        | 18978/988565   | 0.81 (0.57-1.16) | 0.82 (0.57-1.16) | 0.72 (0.68-0.75) | 0.55 (0.52-0.59) | 1/6/0      | 0.665 | 96.4 (<0.001) | 0.253  | <0.001 | 0.25-2.68  | 0.24-2.17 | No  | No  | Non-significant |
| Tan 2013                                           | Cohort                | 7        | 18580/3991181  | 0.94 (0.82-1.07) | 0.94 (0.82-1.07) | 0.89 (0.86-0.93) | 0.81 (0.77-0.86) | 2/5/0      | 0.395 | 87.8 (<0.001) | 0.326  | <0.001 | 0.60-1.46  | 0.59-1.34 | No  | No  | Non-significant |

|                                 |                       |         |               |                  |                  |                  |                  |                 |       |               |       |        |             |             |     |     |                 |
|---------------------------------|-----------------------|---------|---------------|------------------|------------------|------------------|------------------|-----------------|-------|---------------|-------|--------|-------------|-------------|-----|-----|-----------------|
| Taylor 2008                     | Case-control          | 4       | NA/578428     | 0.75 (0.50-1.11) | 0.75 (0.50-1.11) | 0.53 (0.50-0.56) | 0.52 (0.49-0.55) | 1/3/0           | 0.039 | 79.3 (0.002)  | 0.152 | <0.001 | 0.13-4.20   | 0.12-2.36   | Yes | No  | Non-significant |
| Bonovas 2006                    | RCT                   | 7       | 74/63353      | 0.95 (0.83-1.09) | 0.95 (0.84-1.09) | 0.95 (0.84-1.09) | 1.07 (0.87-1.32) | 0/7/0           | 0.805 | 0.0 (0.420)   | 0.477 | 0.477  | 0.79-1.14   | 0.79-1.14   | No  | Yes | Non-significant |
| <b>Lymphoma</b>                 | Observational studies | 17(16)* | NA/8863       | -                | 0.85 (0.73-0.99) | 0.86 (0.80-0.92) | 0.96 (0.83-1.11) | 7(6)/9/1        | 0.850 | 69.1 (<0.001) | 0.042 | <0.001 | 0.52-1.40   | 0.54-1.39   | No  | No  | Weak            |
| Ye 2017                         | Observational studies | 13      | NA/7825       | 0.82 (0.69-0.99) | 0.83 (0.69-0.99) | 0.86 (0.80-0.93) | 0.96 (0.83-1.11) | 5/7/1           | 0.734 | 72.9 (<0.001) | 0.041 | <0.001 | 0.46-1.47   | 0.50-1.49   | No  | No  | Weak            |
| Pradelli 2015                   | Observational studies | 10(9)*  | NA/3469       | 0.81 (0.68-0.96) | 0.86 (0.74-1.00) | 0.87 (0.80-0.96) | 0.94 (0.80-1.11) | 4(3)/6/0        | 0.810 | 42.5 (0.084)  | 0.051 | 0.003  | 0.60-1.23   | 0.63-1.21   | No  | No  | Non-significant |
| <b>Melanoma</b>                 | Overall               | 24      | NA/434680     | -                | 0.94 (0.86-1.03) | 0.94 (0.88-1.00) | 0.79 (0.66-0.96) | 3/21/0          | 0.836 | 26.0 (0.121)  | 0.204 | 0.063  | 0.75-1.19   | 0.76-1.17   | No  | No  | Non-significant |
| Li 2014                         | Overall               | 21      | 8433/529335   | 0.94 (0.85-1.04) | 0.94 (0.86-1.03) | 0.94 (0.88-1.00) | 0.79 (0.66-0.96) | 3/18/0          | 0.959 | 33.8 (0.070)  | 0.182 | 0.052  | 0.74-1.19   | 0.60-1.46   | No  | No  | Non-significant |
| Bonovas 2010                    | RCT                   | 9       | NA/62658      | 0.92 (0.62-1.36) | 0.92 (0.62-1.36) | 0.93 (0.68-1.27) | 1.70 (0.78-3.71) | 1/8/0           | 0.680 | 22.0 (0.470)  | 0.686 | 0.639  | 0.42-2.02   | 0.45-1.93   | No  | Yes | Non-significant |
| Freeman 2006                    | RCT                   | 6       | 154/35088     | 0.87 (0.61-1.23) | 0.88 (0.57-1.34) | 0.87 (0.61-1.25) | 1.07 (0.64-1.79) | 1/5/0           | 0.907 | 16.6 (0.310)  | 0.538 | 0.457  | 0.38-2.02   | 0.40-1.89   | No  | Yes | Non-significant |
| Dellavalle 2005                 | RCT                   | 5       | 126/31198     | 0.90 (0.56-1.44) | 0.90 (0.56-1.44) | 0.88 (0.62-1.26) | 1.07 (0.64-1.79) | 1/4/0           | 0.638 | 60.0 (0.080)  | 0.651 | 0.497  | 0.27-2.92   | 0.30-2.57   | No  | Yes | Non-significant |
| <b>Myeloma</b>                  | Observational studies | 5       | NA/609        | 0.89 (0.53-1.51) | 0.89 (0.53-1.51) | 0.89 (0.73-1.09) | 0.83 (0.61-1.12) | 2/2/1           | 0.983 | 81.0 (<0.001) | 0.674 | 0.251  | 0.14-5.73   | 0.17-4.78   | No  | Yes | Non-significant |
| Pradelli 2015                   | Observational studies | 5       | NA/609        | 0.89 (0.53-1.51) | 0.89 (0.53-1.51) | 0.89 (0.73-1.09) | 0.83 (0.61-1.12) | 2/2/1           | 0.983 | 81.0 (<0.001) | 0.674 | 0.251  | 0.14-5.73   | 0.17-4.78   | No  | Yes | Non-significant |
| <b>Pancreatic cancer</b>        | Overall               | 21(20)* | NA/2832052    | -                | 0.89 (0.75-1.06) | 0.91 (0.86-0.97) | 1.10 (0.81-1.49) | 1/19(18)/1      | 0.927 | 79.0 (<0.001) | 0.207 | 0.003  | 0.46-1.71   | 0.49-1.71   | No  | Yes | Non-significant |
| Cui 2012                        | Overall               | 18      | 7807/1692863  | 0.89 (0.74-1.07) | 0.89 (0.74-1.07) | 0.91 (0.86-0.97) | 0.95 (0.87-1.04) | 1/16/1          | 0.889 | 37.7 (0.200)  | 0.216 | 0.003  | 0.46-1.74   | 0.48-1.74   | No  | Yes | Non-significant |
| Cui 2012                        | RCT                   | 3       | NA/7118       | 0.99 (0.44-2.21) | 0.99 (0.44-2.21) | 0.99 (0.44-2.21) | 0.90 (0.37-2.20) | 0/3/0           | 0.494 | 0.0 (0.840)   | 0.982 | 0.982  | 0.01-178.30 | 0.01-178.30 | No  | Yes | Non-significant |
| Cui 2012                        | Observational studies | 15      | NA/3166078    | -                | 0.88 (0.73-1.07) | 0.91 (0.86-0.97) | 0.93 (0.77-1.12) | 1/13/1          | 0.803 | 84.3 (<0.001) | 0.211 | 0.003  | 0.44-1.78   | 0.47-1.78   | No  | Yes | Non-significant |
| Cui 2012                        | Case-control          | 8       | 4836/542048   | 0.74 (0.51-1.07) | 0.74 (0.51-1.07) | 0.70 (0.62-0.79) | 0.93 (0.77-1.12) | 1/7/0           | 0.781 | 86.0 (<0.001) | 0.108 | <0.001 | 0.21-2.55   | 0.22-2.23   | No  | Yes | Non-significant |
| Cui 2012                        | Cohort                | 7       | NA            | 1.05 (0.93-1.19) | 1.05 (0.93-1.18) | 1.01 (0.94-1.08) | 0.95 (0.87-1.04) | 0/6/1           | 0.287 | 40.0 (0.130)  | 0.402 | 0.818  | 0.78-1.41   | 0.78-1.30   | No  | Yes | Non-significant |
| Bonovas 2008                    | Overall               | 13(11)* | 3521/914601   | 0.88 (0.63-1.23) | 0.86 (0.61-1.21) | 0.91 (0.84-0.99) | 0.37 (0.30-0.46) | 1/12(10)/0      | 0.788 | 87.8 (<0.001) | 0.379 | 0.022  | 0.30-2.47   | 0.34-2.44   | No  | No  | Non-significant |
| Bonovas 2008                    | RCT                   | 3       | NA/7118       | 0.99 (0.44-2.21) | 0.99 (0.44-2.21) | 0.99 (0.44-2.21) | 0.90 (0.37-2.21) | 0/3/0           | 0.493 | 0.0 (0.835)   | 0.983 | 0.983  | 0.01-178.30 | 0.01-178.30 | No  | Yes | Non-significant |
| Bonovas 2008                    | Observational studies | 10(8)*  | 3515/907843   | 0.86 (0.60-1.24) | 0.84 (0.58-1.22) | 0.91 (0.84-0.99) | 0.37 (0.30-1.46) | 1/7/0           | 0.705 | 91.4 (<0.001) | 0.351 | 0.022  | 0.26-2.74   | 0.30-2.72   | No  | Yes | Non-significant |
| Bonovas 2008                    | Case-control          | 5       | 3301/542734   | 0.70 (0.37-1.33) | 0.70 (0.37-1.33) | 0.84 (0.77-0.93) | 0.37 (0.30-0.46) | 1/4/0           | 0.597 | 95.0 (<0.001) | 0.279 | <0.001 | 0.07-7.20   | 0.10-6.79   | No  | No  | Non-significant |
| Bonovas 2008                    | Cohort                | 5(3)*   | 214/364749    | 1.11 (0.95-1.29) | 1.1 (0.95-1.29)  | 1.1 (0.95-1.29)  | 1.09 (0.89-1.34) | 0/3/0           | 0.182 | 0.0 (0.950)   | 0.193 | 0.193  | 0.41-2.96   | 0.41-2.96   | No  | Yes | Non-significant |
| <b>Prostate cancer</b>          | Overall               | 67(64)* | NA            | -                | 0.94 (0.90-0.99) | 1.02 (1.00-1.04) | -                | 19(18)/44(42)/4 | 0.002 | 74.5 (<0.001) | 0.017 | 0.056  | 0.71-1.24   | 0.78-1.33   | Yes | -   | Weak            |
| Raval 2016                      | Cohort                | 27      | NA            | 0.90 (0.80-1.01) | 0.90 (0.80-1.01) | 0.90 (0.84-0.96) | 0.88 (0.76-1.02) | 9/16/2          | 0.938 | 62.0 (<0.001) | 0.067 | 0.001  | 0.56-1.43   | 0.57-1.42   | No  | Yes | Non-significant |
| Scosyrev 2013                   | Cohort                | 8       | 2812/12843    | 0.91 (0.72-1.13) | 0.90 (0.72-1.13) | 0.93 (0.83-1.04) | 0.99 (0.83-1.18) | 3/4/1           | 0.679 | 68.7 (0.002)  | 0.382 | 0.197  | 0.45-1.80   | 0.49-1.77   | No  | Yes | Non-significant |
| Bansal 2012                     | Observational studies | 26(25)* | 56845/1893356 | 0.93 (0.87-0.99) | 0.93 (0.86-0.99) | 1.02 (1.00-1.04) | 1.02 (0.96-1.08) | 8/14(13)/4      | 0.010 | 83.4 (<0.001) | 0.032 | 0.048  | 0.70-1.22   | 0.78-1.34   | Yes | No  | Weak            |
| Mass 2012                       | Cohort                | 6       | NA/1466       | 1.00 (0.80-1.19) | 1.03 (0.85-1.25) | 1.01 (0.89-1.14) | 0.99 (0.83-1.18) | 1/4/1           | 0.619 | 45.6 (0.101)  | 0.764 | 0.880  | 0.60-1.76   | 0.62-1.65   | No  | Yes | Non-significant |
| Bonovas 2008                    | Overall               | 19(18)* | 62327/884871  | 0.95 (0.73-1.23) | 0.94 (0.72-1.22) | 0.61 (0.60-0.63) | 0.46 (0.45-0.48) | 2/14(13)/3      | 0.015 | 98.1 (<0.001) | 0.623 | <0.001 | 0.30-2.90   | 0.20-1.83   | Yes | No  | Non-significant |
| Bonovas 2008                    | RCT                   | 6       | 1058/40178    | 1.06 (0.93-1.20) | 1.06 (0.93-1.20) | 1.06 (0.94-1.19) | 1.00 (0.80-1.26) | 0/5/1           | 0.838 | 9.0 (0.360)   | 0.386 | 0.372  | 0.85-1.31   | 0.85-1.31   | No  | Yes | Non-significant |
| Bonovas 2008                    | Observational studies | 13(12)* | 61314/844693  | 0.89 (0.65-1.24) | 0.88 (0.64-1.21) | 0.60 (0.58-0.61) | 0.46 (0.45-0.48) | 2/9(8)/2        | 0.080 | 98.6 (<0.001) | 0.432 | <0.001 | 0.26-2.98   | 0.19-1.91   | Yes | No  | Non-significant |
| Taylor 2008                     | Case-control          | 7       | NA/518043     | 0.75 (0.50-1.11) | 0.74 (0.45-1.20) | 0.57 (0.55-0.58) | 0.35 (0.20-0.48) | 2/4/1           | 0.504 | 99.1 (<0.001) | 0.216 | <0.001 | 0.14-3.93   | 0.12-2.66   | No  | No  | Non-significant |
| <b>Non-melanoma skin cancer</b> | Overall               | 17      | NA/1240281    | -                | 1.07 (1.00-1.16) | 1.09 (1.06-1.12) | 1.09 (1.06-1.13) | 1/11/5          | 0.768 | 58.5 (0.001)  | 0.063 | <0.001 | 0.88-1.31   | 0.90-1.32   | No  | No  | Non-significant |
| Yang 2017                       | Overall               | 12      | 57004/1591372 | -                | 1.10 (1.01-1.20) | 1.10 (1.07-1.13) | 1.09 (1.06-1.13) | 1/6/5           | 0.876 | 66.6 (0.001)  | 0.031 | <0.001 | 0.87-1.38   | 0.89-1.36   | No  | Yes | Weak            |
| Yang 2017                       | RCT                   | 7       | 1211/63157    | 1.09 (0.85-1.39) | 1.09 (0.85-1.39) | 1.05 (0.94-1.17) | 1.03 (0.87-1.22) | 1/4/2           | 0.679 | 59.9 (0.021)  | 0.510 | 0.384  | 0.58-2.04   | 0.60-1.83   | No  | Yes | Non-significant |
| Yang 2017                       | Observational studies | 5       | 55793/1528215 | 1.11 (1.02-1.22) | 1.11 (1.02-1.22) | 1.10 (1.07-1.13) | 1.09 (1.06-1.13) | 0/2/3           | 0.840 | 76.8 (0.002)  | 0.015 | <0.001 | 0.82-1.50   | 0.84-1.44   | No  | Yes | Weak            |
| Li 2014                         | Overall               | 10      | 3578/103260   | 1.03 (0.90-1.19) | 1.03 (0.90-1.19) | 1.12 (1.05-1.20) | 1.62 (0.66-3.88) | 1/8/1           | 0.158 | 61.7 (0.007)  | 0.651 | 0.001  | 0.70-1.52   | 0.79-1.61   | No  | Yes | Non-significant |

D/N/I=Decreasing risk/No difference/Increasing risk; ES=Effect size; CI=Confidence interval; PI, Prediction interval

§ Risk ratio (95% Confidence interval) of the largest study in each meta-analysis.

† I<sup>2</sup> metric of inconsistency (95% confidence interval of I<sup>2</sup>) and P-value of the Cochran Q test for evaluation of heterogeneity.

\* Studies with asymmetric effect size are excluded from re-analysis.

\*\* Convincing or suggestive level of evidence due to the greater number of studies that decrease risk.

**Supplementary Table S2. PRISMA checklist**

| Section/topic             | #  | Checklist item                                                                                                                                                                                                                                                                                              | Reported on page # |
|---------------------------|----|-------------------------------------------------------------------------------------------------------------------------------------------------------------------------------------------------------------------------------------------------------------------------------------------------------------|--------------------|
| <b>TITLE</b>              |    |                                                                                                                                                                                                                                                                                                             |                    |
| Title                     | 1  | Identify the report as a systematic review, meta-analysis, or both.                                                                                                                                                                                                                                         | 1                  |
| <b>ABSTRACT</b>           |    |                                                                                                                                                                                                                                                                                                             |                    |
| Structured summary        | 2  | Provide a structured summary including, as applicable: background; objectives; data sources; study eligibility criteria, participants, and interventions; study appraisal and synthesis methods; results; limitations; conclusions and implications of key findings; systematic review registration number. | 1                  |
| <b>INTRODUCTION</b>       |    |                                                                                                                                                                                                                                                                                                             |                    |
| Rationale                 | 3  | Describe the rationale for the review in the context of what is already known.                                                                                                                                                                                                                              | 2                  |
| Objectives                | 4  | Provide an explicit statement of questions being addressed with reference to participants, interventions, comparisons, outcomes, and study design (PICOS).                                                                                                                                                  | 2                  |
| <b>METHODS</b>            |    |                                                                                                                                                                                                                                                                                                             |                    |
| Protocol and registration | 5  | Indicate if a review protocol exists, if and where it can be accessed (e.g., Web address), and, if available, provide registration information including registration number.                                                                                                                               | NA                 |
| Eligibility criteria      | 6  | Specify study characteristics (e.g., PICOS, length of follow-up) and report characteristics (e.g., years considered, language, publication status) used as criteria for eligibility, giving rationale.                                                                                                      | 2-3                |
| Information sources       | 7  | Describe all information sources (e.g., databases with dates of coverage, contact with study authors to identify additional studies) in the search and date last searched.                                                                                                                                  | 2                  |
| Search                    | 8  | Present full electronic search strategy for at least one database, including any limits used, such that it could be repeated.                                                                                                                                                                               | 2-3                |
| Study selection           | 9  | State the process for selecting studies (i.e., screening, eligibility, included in systematic review, and, if applicable, included in the meta-analysis).                                                                                                                                                   | 2-3, Figure 1      |
| Data collection process   | 10 | Describe method of data extraction from reports (e.g., piloted forms, independently, in duplicate) and any processes for obtaining and confirming data from investigators.                                                                                                                                  | 2-4                |
| Data items                | 11 | List and define all variables for which data were sought (e.g., PICOS, funding sources) and any assumptions and simplifications made.                                                                                                                                                                       | 2-4                |

|                                    |    |                                                                                                                                                                                                                        |     |
|------------------------------------|----|------------------------------------------------------------------------------------------------------------------------------------------------------------------------------------------------------------------------|-----|
| Risk of bias in individual studies | 12 | Describe methods used for assessing risk of bias of individual studies (including specification of whether this was done at the study or outcome level), and how this information is to be used in any data synthesis. | NA  |
| Summary measures                   | 13 | State the principal summary measures (e.g., risk ratio, difference in means).                                                                                                                                          | 3-4 |
| Synthesis of results               | 14 | Describe the methods of handling data and combining results of studies, if done, including measures of consistency (e.g., $I^2$ ) for each meta-analysis.                                                              | 3-4 |

|                             |    |                                                                                                                                                  |    |
|-----------------------------|----|--------------------------------------------------------------------------------------------------------------------------------------------------|----|
| Risk of bias across studies | 15 | Specify any assessment of risk of bias that may affect the cumulative evidence (e.g., publication bias, selective reporting within studies).     | NA |
| Additional analyses         | 16 | Describe methods of additional analyses (e.g., sensitivity or subgroup analyses, meta-regression), if done, indicating which were pre-specified. | NA |

## RESULTS

|                               |    |                                                                                                                                                                                                          |                             |
|-------------------------------|----|----------------------------------------------------------------------------------------------------------------------------------------------------------------------------------------------------------|-----------------------------|
| Study selection               | 17 | Give numbers of studies screened, assessed for eligibility, and included in the review, with reasons for exclusions at each stage, ideally with a flow diagram.                                          | 4, Figure 1                 |
| Study characteristics         | 18 | For each study, present characteristics for which data were extracted (e.g., study size, PICOS, follow-up period) and provide the citations.                                                             | 4, Figure 1                 |
| Risk of bias within studies   | 19 | Present data on risk of bias of each study and, if available, any outcome level assessment (see item 12).                                                                                                | N/A                         |
| Results of individual studies | 20 | For all outcomes considered (benefits or harms), present, for each study: (a) simple summary data for each intervention group (b) effect estimates and confidence intervals, ideally with a forest plot. | 6-9, Supplements            |
| Synthesis of results          | 21 | Present results of each meta-analysis done, including confidence intervals and measures of consistency.                                                                                                  | 6-9, Table 1-4              |
| Risk of bias across studies   | 22 | Present results of any assessment of risk of bias across studies (see Item 15).                                                                                                                          | 6-9, Table 1-4, Supplements |
| Additional analysis           | 23 | Give results of additional analyses, if done (e.g., sensitivity or subgroup analyses, meta-regression [see Item 16]).                                                                                    | N/A                         |

## DISCUSSION

|                     |    |                                                                                                                                                                                      |       |
|---------------------|----|--------------------------------------------------------------------------------------------------------------------------------------------------------------------------------------|-------|
| Summary of evidence | 24 | Summarize the main findings including the strength of evidence for each main outcome; consider their relevance to key groups (e.g., healthcare providers, users, and policy makers). | 10-12 |
| Limitations         | 25 | Discuss limitations at study and outcome level (e.g., risk of bias), and at review-level (e.g., incomplete retrieval of identified research, reporting bias).                        | 12    |

|                |    |                                                                                                                                            |       |
|----------------|----|--------------------------------------------------------------------------------------------------------------------------------------------|-------|
| Conclusions    | 26 | Provide a general interpretation of the results in the context of other evidence, and implications for future research.                    | 12-13 |
| <b>FUNDING</b> |    |                                                                                                                                            |       |
| Funding        | 27 | Describe sources of funding for the systematic review and other support (e.g., supply of data); role of funders for the systematic review. | 13    |

*From:* Moher D, Liberati A, Tetzlaff J, Altman DG, The PRISMA Group (2009). Preferred Reporting Items for Systematic Reviews and Meta-Analyses: The PRISMA Statement. PLoS Med 6(7): e1000097. doi:10.1371/journal.pmed1000097

For more information, visit: [www.prisma-statement.org](http://www.prisma-statement.org).
